# Supplementary material
Source: PubMed Central journal article supplement (PMC4102003)

## SUPPLEMENTARY FIGURE LEGENDS

**SUPPLEMENTARY FIGURE 1.** *Ex vivo* cytotoxicity of m157-expressing cells by Rae-1 Tg NK cells from naïve and MCMV-infected mice.

(A) Freshly isolated splenocytes from naïve Rae-1 Tg (black circles) or WT littermate controls (open circles) were enriched for NK cells and incubated for 4 h with  $^{51}\text{Cr}$  labeled Ba/F3 (dashed line) or Ba/F3 cells expressing Rae-1 $\epsilon$  (solid line). (B) Freshly isolated splenocytes from day 4 MCMV-infected Rae-1 Tg (black circles) or WT littermate controls (open circles) were enriched for NK cells and incubated for 4 h with  $^{51}\text{Cr}$  labeled Ba/F3 (dashed line) or Ba/F3 cells expressing Rae-1 $\epsilon$  (solid line).

**SUPPLEMENTARY FIGURE 2.** Delayed rejection of  $B2m^{-/-}$  splenocytes in Rae-1 Tg mice.

Splenocytes from  $B2m^{-/-}$  or WT mice were harvested and differentially labeled as CFSE<sup>hi</sup> or CFSE<sup>lo</sup>, respectively. Cells were injected intravenously at equal ratios into either Rae-1 Tg or WT control mice, some of which were pretreated at d -1 with anti-NK1.1 mAb to deplete NK cells. Plots show percentages of CFSE<sup>hi</sup>-labeled  $B2m^{-/-}$  cells (of total CFSE<sup>+</sup> cells injected) recovered from the spleens of untreated Rae-1 Tg (black circles) and WT control mice (open circles), or anti-NK1.1 treated Rae-1 Tg (black triangles) and WT control mice (open triangles) at 10 hours.

A

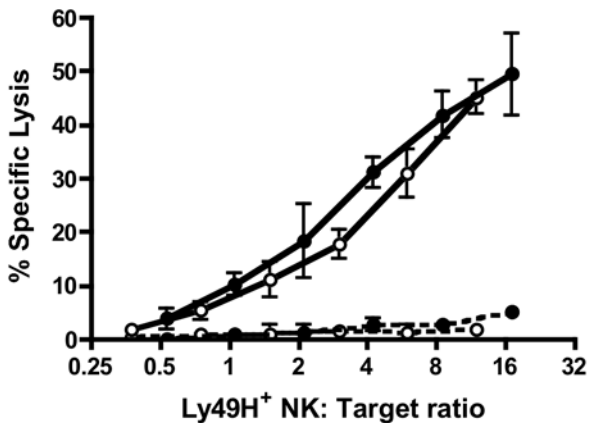

B

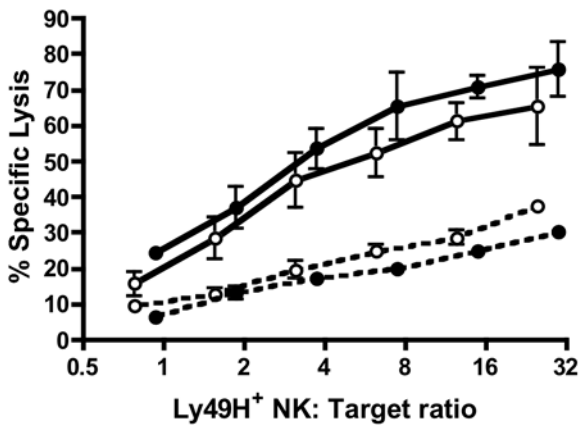

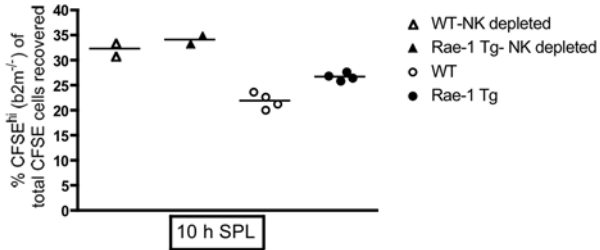

Supplement: NIHMS588715-supplement-Supplementary_Junk.pdf [file NIHMS588715-supplement-Supplementary_Junk.pdf]
